# Supplementary material for: Infantile restrictive cardiomyopathy: cTnI-R170G/W impair the interplay of sarcomeric proteins and the integrity of thin filaments
Source: PubMed Central journal article supplement (PMC7077804; doi:10.1371/journal.pone.0229227), 2020-03-17
Supplement: pone.0229227.s001.pdf [file pone.0229227.s001.pdf]

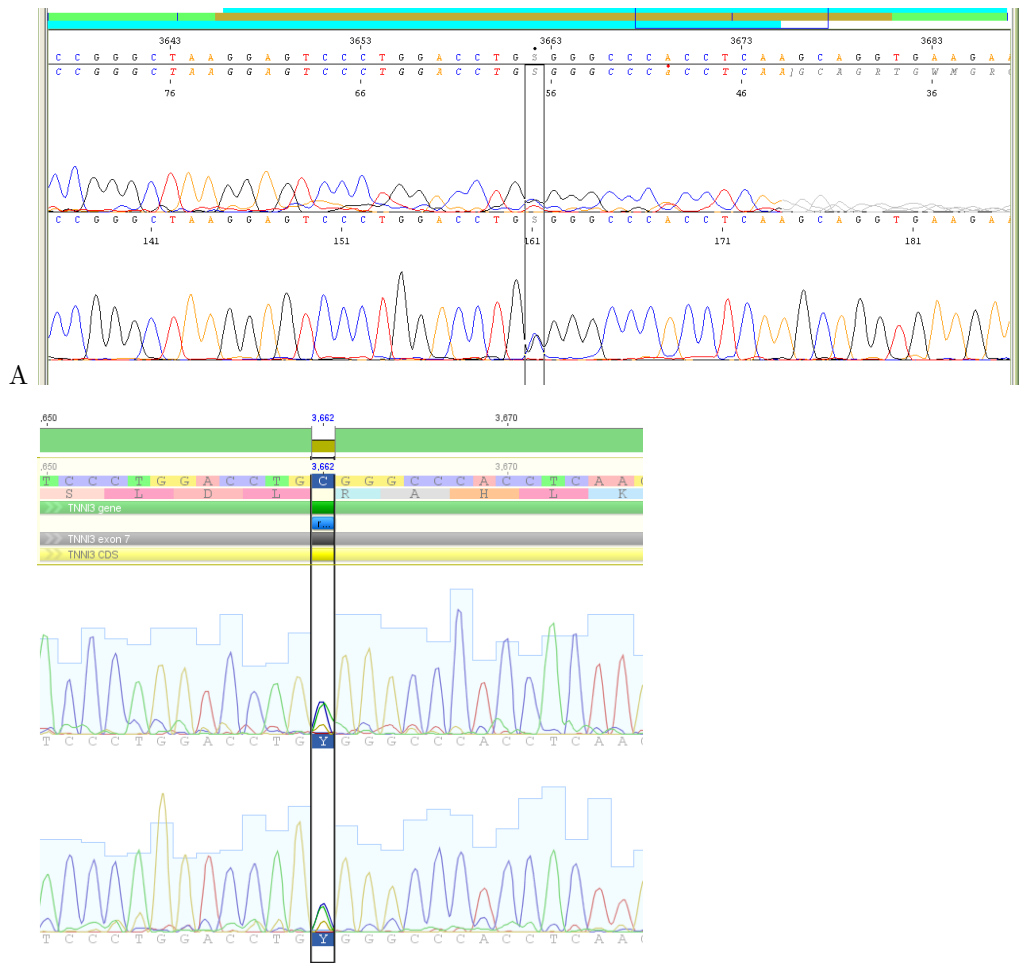

**B**  
**S1 Fig. Electropherograms of the sequencing of *TNNI3* exon 7 of the patients' DNA** A: patient carrying the cTnI-R170G mutation (chr:19:55665439:C>G; NM.000363.5:c.508 C>G); B: patient carrying the cTnI-R170W mutation (chr:19:55665439:C>T; NM.000363.5:c.508 C>T).
