# Supplementary material for: Infantile restrictive cardiomyopathy: cTnI-R170G/W impair the interplay of sarcomeric proteins and the integrity of thin filaments
Source: PubMed Central journal article supplement (PMC7077804; doi:10.1371/journal.pone.0229227), 2020-03-17
Supplement: pone.0229227.s002.pdf [file pone.0229227.s002.pdf]

|         |                |     |                                                              |     |
|---------|----------------|-----|--------------------------------------------------------------|-----|
| Human   | NP_000354.4    | 1   | MADGSSDA-AREPRPAPAPIRRRSS-NYRAYATEPHAKKSKISASRKLQKLTLLQIAK   | 58  |
| Rat     | NP_058840.1    | 1   | ...E...-.G..Q....V....A.....M.....                           | 59  |
| Bovine  | NP_001035607.1 | 1   | ...R.GGST.GDTV...P.V....A.....M.....                         | 60  |
| Chicken | AAH88784.1     | 44  | .....A...S....QV.R.P.....S.M.....                            | 84  |
| Frog    | NP_998735.1    | 14  | .KS.A-...G..V....RQ.....R..                                  | 52  |
| Fly     | CAA42020.1     | 55  | .....A                                                       | 56  |
| Human   | NP_000354.4    | 59  | QELEREAEERRGEKGRALSTRC-QPLELAGLGFELQDLRQLHARVDKVDDEERYDIEAK  | 117 |
| Rat     | NP_058840.1    | 60  | ..M.....V.....V.D...E.....V...                               | 118 |
| Bovine  | NP_001035607.1 | 61  | .....V.....V.....V.....V.....                                | 119 |
| Chicken | AAH88784.1     | 85  | A.M...E...AR..E.Y.EEH.-E..Q.S.SLS.....E...I.V.....M...       | 143 |
| Frog    | NP_998735.1    | 53  | R.....EQ..A...Q.H.GEL.-P.P..E...V.Q..E...E...IGR.....MGTR    | 111 |
| Fly     | CAA42020.1     | 57  | E..KK.Q.RKAA.RR.IIEE..GS.RN.SDASEG...EI.EEYVE.MYICEGQKW.L.YE | 116 |
| Human   | NP_000354.4    | 118 | VTKNITEIADLTQKIFDLRGKFKRPTLRRVRISADAMMQALLGARAKESLDLRAHLKQV- | 176 |
| Rat     | NP_058840.1    | 119 | .....Y.....T.....                                            | 177 |
| Bovine  | NP_001035607.1 | 120 | .....N.....T.....                                            | 178 |
| Chicken | AAH88784.1     | 144 | .N...S..E..NL.....K.N....L.....R....TKH.V.M...N...K          | 203 |
| Frog    | NP_998735.1    | 112 | .S..MA.MEE.RRRVAG--R.V..A....L.....A....SKHRVGT...G.R..-     | 168 |
| Fly     | CAA42020.1     | 117 | .R.KDW..N..NAQVN.....VK.A.KK.SKYENKF--K.QKK.A.-FNF.NQ..V.    | 172 |
| Human   | NP_000354.4    | 177 | --KKEDTEKENREVGDWKRNIDALSGMEGRKKKFES                         | 210 |
| Rat     | NP_058840.1    | 178 | --...I.....                                                  | 210 |
| Bovine  | NP_001035607.1 | 179 | --.....G                                                     | 212 |
| Chicken | AAH88784.1     | 204 | QT..D.AD.DI.....V.....                                       | 239 |
| Frog    | NP_998735.1    | 169 | --R.D.A...S.....V.....A                                      | 202 |

**S2 Fig. Alignment of the cardiac troponin I sequence.** Conserved amino acid residues in comparison to the human sequence are given as dots. The red box highlights the Arginin 170, which is conserved in all species down to *Drosophila melanogaster*.
