# Supplementary material for: Infantile restrictive cardiomyopathy: cTnI-R170G/W impair the interplay of sarcomeric proteins and the integrity of thin filaments
Source: PubMed Central journal article supplement (PMC7077804; doi:10.1371/journal.pone.0229227), 2020-03-17
Supplement: pone.0229227.s003.pdf [file pone.0229227.s003.pdf]

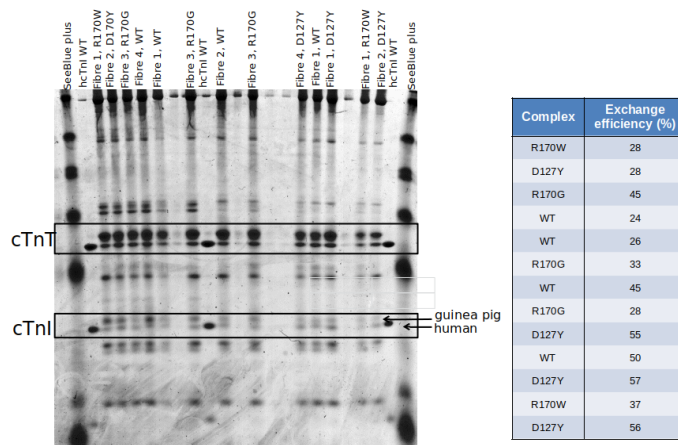

**S3 Fig. Degree of replacement of endogenous (guinea pig) troponin by the recombinant (human) Tn-complex in fibres.** After force measurements, fibres were fixed, homogenized and loaded on a prolonged SDS gel (12.5% AA). The extended run distance in combination with a longer and slower running time (5 mA, 45 V, 18 h) led to a greater resolution of proteins in the range of 25-40 kDa. Gel was stained with Coomassie Brilliant Blue R-250 and the relative amounts of the endogenous and recombinant TnI-band were determined by densitometry. The cTnI-D127Y variant shown on the gel was not included in this study.
