# Supplementary material for: Infantile restrictive cardiomyopathy: cTnI-R170G/W impair the interplay of sarcomeric proteins and the integrity of thin filaments
Source: PubMed Central journal article supplement (PMC7077804; doi:10.1371/journal.pone.0229227), 2020-03-17
Supplement: pone.0229227.s004.pdf [file pone.0229227.s004.pdf]

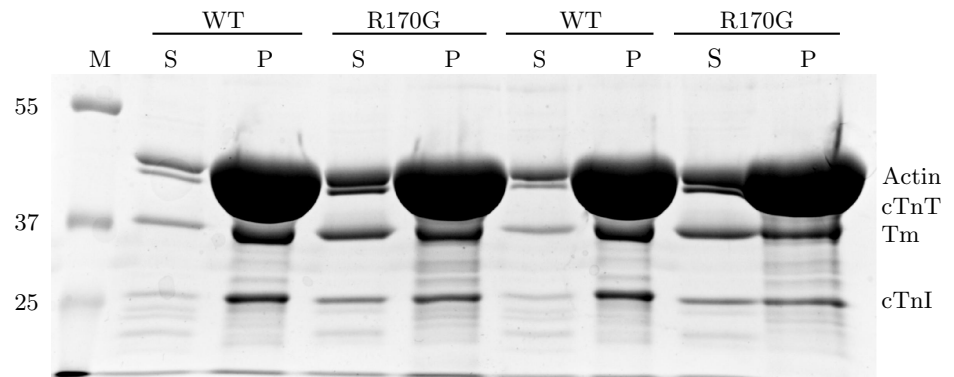

**S4 Fig. Representative gel image of a cosedimentation experiment with cTnI wildtype (WT) and R170G, stained with Coomassie.** M is the protein standard (bands given in kDa), S is the supernatant, P the pellet of the respective sample. For data analysis, cTnI band densities were analyzed. In total, 10 gels were analyzed for each mutant, giving an n=20 data points.
