# Supplementary material for: Infantile restrictive cardiomyopathy: cTnI-R170G/W impair the interplay of sarcomeric proteins and the integrity of thin filaments
Source: PubMed Central journal article supplement (PMC7077804; doi:10.1371/journal.pone.0229227), 2020-03-17
Supplement: pone.0229227.s005.pdf [file pone.0229227.s005.pdf]

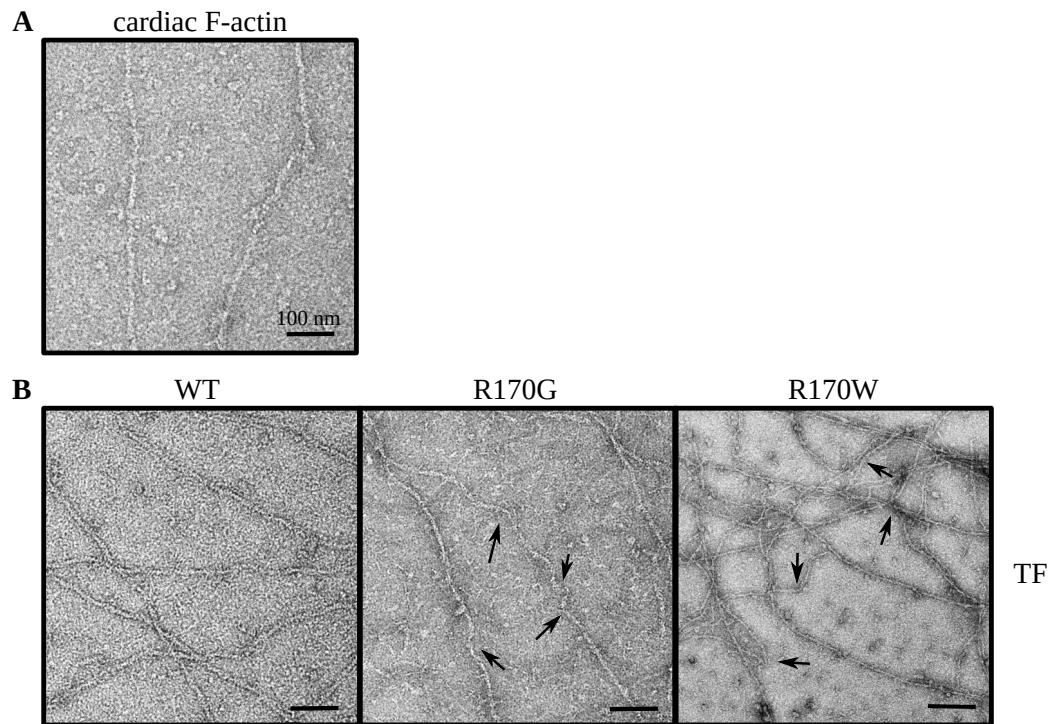

**S5 Fig. Representative electron microscopic images of cardiac F-actin (A), reconstituted thin filaments (TF) from cardiac F-actin, cardiac tropomyosin and cardiac troponin complexes containing wildtype cTnI (WT), cTnI-R170G or R170W (B). The black bars represent 100 nm in all images. The arrows indicate wavy filaments, filament breaks and kinks.**
