# Supplementary material for: Infantile restrictive cardiomyopathy: cTnI-R170G/W impair the interplay of sarcomeric proteins and the integrity of thin filaments
Source: PubMed Central journal article supplement (PMC7077804; doi:10.1371/journal.pone.0229227), 2020-03-17
Supplement: pone.0229227.s006.pdf [file pone.0229227.s006.pdf]

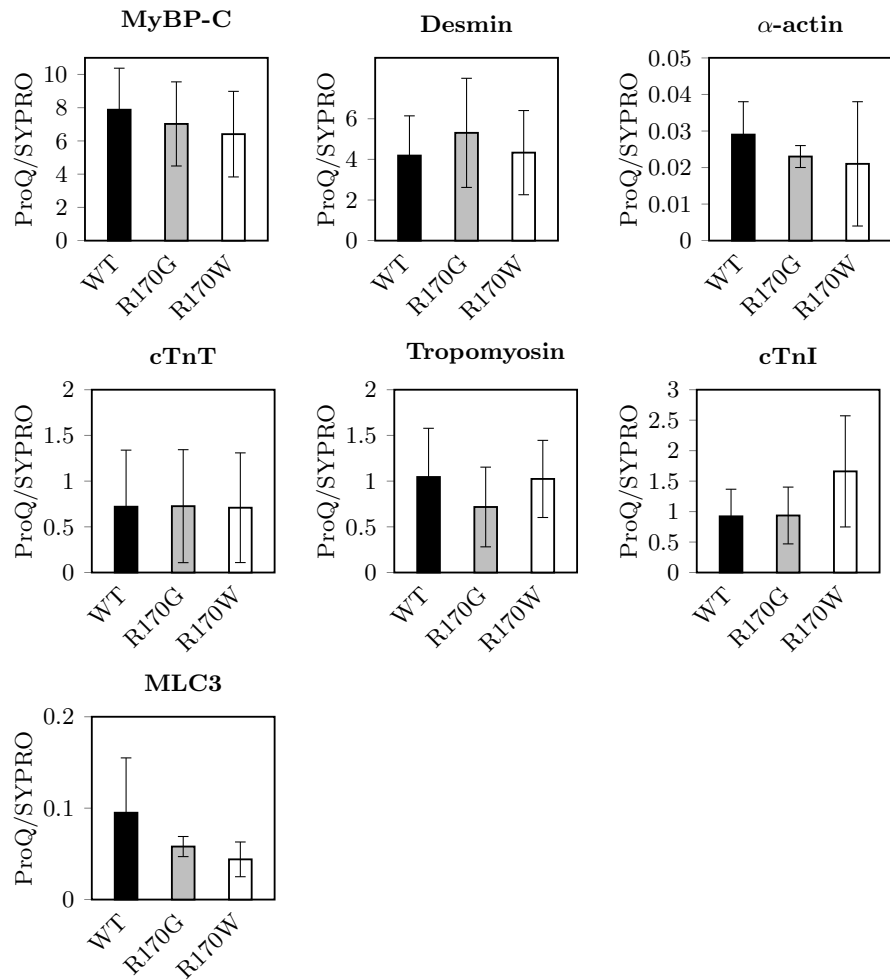

**S6 Fig. Phosphorylation analysis of guinea pig cardiac skinned fibres after exchange of troponin with recombinant human cardiac troponin containing cTnI wildtype (WT) or R170G/W.** Fibres were treated with 15% TCA, homogenized and analyzed via SDS-PAGE with subsequent ProQ/SYPRO staining. Data are given as band intensity ratios of ProQ and SYPRO staining of the respective band  $\pm$ SEM, n=4.
