# Supplementary material for: Infantile restrictive cardiomyopathy: cTnI-R170G/W impair the interplay of sarcomeric proteins and the integrity of thin filaments
Source: PubMed Central journal article supplement (PMC7077804; doi:10.1371/journal.pone.0229227), 2020-03-17
Supplement: pone.0229227.s008.pdf [file pone.0229227.s008.pdf]

**S1 Table. Primers used for the site-directed mutagenesis of cTnI cDNA and for cloning of cMyBPC-C0C2 cDNA into pET28a** For the cTnI primers, the mutated position is bolded. For the cMyBPC primers, restriction sites included into the primer sequences are bolded and the corresponding enzyme indicated in brackets.

|                        |                                                                                                                              |
|------------------------|------------------------------------------------------------------------------------------------------------------------------|
| cTnI-R170G (c.508 C>G) | for: 5'-GAGTCCCTGGACCTG <b>GGGG</b> CCCCACCTCAAGC-3'<br>rev: 5'-GCTTGAGGTGGGCCCC <b>C</b> AGGTCCAGGGACTC-3'                  |
| cTnI-R170W (c.508 C>T) | for: 5'-GAGTCCCTGGACCTG <b>T</b> GGGGCCCCACCTCAAGC-3'<br>rev: 5'-GCTTGAGGTGGGCCCC <b>ACC</b> AGGTCCAGGGACTC-3'               |
| cMyBPC-C0C2            | for: 5'-GGGAATT <b>CCATATG</b> ATGCCTGAGCCGGGGAAGAA-3' (NdeI)<br>rev: 5'-CTAG <b>GGATC</b> CCCTAGGGCTCTTTCACAAAGA-3' (BamHI) |
