# Supplementary material for: Infantile restrictive cardiomyopathy: cTnI-R170G/W impair the interplay of sarcomeric proteins and the integrity of thin filaments
Source: PubMed Central journal article supplement (PMC7077804; doi:10.1371/journal.pone.0229227), 2020-03-17
Supplement: pone.0229227.s009.pdf [file pone.0229227.s009.pdf]

**S2 Table. Basal and maximal forces of puinea pig skinned fibres after exchange of endogenous troponin to human recombinant troponin containing wildtype cTnI or cTnI-R170G or W.**  $F_{\text{pass}}$  is the basal or passive force and  $F_{\text{max}}$  the maximal force, both normalized to the fibre cross section of the respective fibre, given as mean and standard deviation (SD). n is the number of fibres analyzed.

|              | $F_{\text{pass}}$ [mN/mm <sup>2</sup> ] | SD   | $F_{\text{max}}$ [mN/mm <sup>2</sup> ] | SD   | n |
|--------------|-----------------------------------------|------|----------------------------------------|------|---|
| <b>WT</b>    | 6.38                                    | 2.13 | 15.39                                  | 7.28 | 6 |
| <b>R170G</b> | 7.10                                    | 3.63 | 9.39                                   | 2.32 | 4 |
| <b>R170W</b> | 12.28                                   | 5.55 | 12.73                                  | 7.51 | 4 |
