# Supplementary material for: Infantile restrictive cardiomyopathy: cTnI-R170G/W impair the interplay of sarcomeric proteins and the integrity of thin filaments
Source: PubMed Central journal article supplement (PMC7077804; doi:10.1371/journal.pone.0229227), 2020-03-17
Supplement: pone.0229227.s010.pdf [file pone.0229227.s010.pdf]

**S3 Table. Parameters of the force measurements of guinea pig skinned fibres after exchange of endogenous troponin to human recombinant troponin containing wildtype cTnI or cTnI-R170G or W at different Ca<sup>2+</sup>-concentrations.** Forces were normalized to the fibre cross section of the respective fibre and the Ca<sup>2+</sup>-sensitivity pCa<sub>50</sub> as well as the cooperativity n<sub>H</sub> were calculated by non-linear regression using the Hill equation.

|                              | <b>WT</b> | <b>R170G</b> | <b>R170W</b> |
|------------------------------|-----------|--------------|--------------|
| <b>pCa<sub>50</sub></b>      | 5.618     | 5.827        | 5.952        |
|                              | 5.704     | 6.166        | 5.991        |
|                              | 5.584     | 6.037        | 5.95         |
|                              | 5.576     | 5.978        | 5.966        |
|                              | 5.729     |              |              |
|                              | 5.656     |              |              |
| <b>pCa<sub>50</sub> mean</b> | 5.645     | 6.002        | 5.965        |
| <b>n<sub>H</sub></b>         | 3.041     | 2.221        | 2.145        |
|                              | 3.196     | 1.739        | 1.754        |
|                              | 4.318     | 1.709        | 1.865        |
|                              | 3.677     | 2.234        | 3.014        |
| <b>n<sub>H</sub> mean</b>    | 3.369     | 1.975        | 2.195        |
