# Supplementary material for: Infantile restrictive cardiomyopathy: cTnI-R170G/W impair the interplay of sarcomeric proteins and the integrity of thin filaments
Source: PubMed Central journal article supplement (PMC7077804; doi:10.1371/journal.pone.0229227), 2020-03-17
Supplement: pone.0229227.s011.pdf [file pone.0229227.s011.pdf]

**S4 Table. Kinetic parameters of the interaction of troponin complexes containing wildtype cTnI (WT) or cTnI-R170G/W with actin and tropomyosin measured by surface plasmon resonance.**  $k_{on}$  is the association rate constant,  $k_{off}$  is the dissociation rate constant,  $K_D$  is the dissociation constant. Data are given as value  $\pm$ SEM, n is the number of measurements.

| <b>Interaction</b> |                                     | <b>WT</b>                                | <b>R170G</b>                             | <b>R170W</b>                             |
|--------------------|-------------------------------------|------------------------------------------|------------------------------------------|------------------------------------------|
| <b>actin</b>       | $k_{on}$ [ $M^{-1}s^{-1}$ ]         | $3880 \pm 3 \cdot 10^{-1}$               | $5430 \pm 2 \cdot 10^{-3}$               | $2610 \pm 6 \cdot 10^{-2}$               |
|                    | $k_{off}$ [ $s^{-1}$ ]              | $2.07 \cdot 10^{-2} \pm 1 \cdot 10^{-6}$ | $1.74 \cdot 10^{-2} \pm 7 \cdot 10^{-9}$ | $1.65 \cdot 10^{-2} \pm 4 \cdot 10^{-7}$ |
|                    | $K_D$ [ $\mu M$ ]                   | $5.34 \pm 5 \cdot 10^{-4}$               | $3.20 \pm 2 \cdot 10^{-6}$               | $6.32 \pm 2 \cdot 10^{-4}$               |
| <b>tropomyosin</b> | $k_{on}$ [ $M^{-1}s^{-1}$ ]         | $1.58 \cdot 10^7 \pm 4 \cdot 10^2$       | $2.86 \cdot 10^7 \pm 2.1 \cdot 10^2$     | $7.1 \cdot 10^6 \pm 8 \cdot 10^2$        |
|                    | $k_{off}$ [ $s^{-1}$ ] [ $s^{-1}$ ] | $32.4 \pm 3 \cdot 10^{-4}$               | $3.1 \pm 6 \cdot 10^{-3}$                | $1.63 \pm 4 \cdot 10^{-4}$               |
|                    | $K_D$ [ $\mu M$ ]                   | $2.05 \pm 6 \cdot 10^{-5}$               | $0.12 \pm 2 \cdot 10^{-4}$               | $0.23 \pm 6 \cdot 10^{-5}$               |
|                    | n                                   | 3                                        | 3                                        | 3                                        |
