# Supplementary material for: Infantile restrictive cardiomyopathy: cTnI-R170G/W impair the interplay of sarcomeric proteins and the integrity of thin filaments
Source: PubMed Central journal article supplement (PMC7077804; doi:10.1371/journal.pone.0229227), 2020-03-17
Supplement: pone.0229227.s012.pdf [file pone.0229227.s012.pdf]

**S5 Table. Parameters of the  $\text{Ca}^{2+}$ -dependent activation of the thin filament, measured by pyrene maleimide labeled tropomyosin fluorescence.**  $\text{Ca}^{2+}$  sensitivity is given as  $\text{pCa}_{50} \pm \text{SEM}$ , cooperativity as the Hill coefficient  $n_{\text{H}} \pm \text{SEM}$ , n is the number of measurements.

| <b>-cMyBP-C</b> |                   |                 |   |
|-----------------|-------------------|-----------------|---|
| cTnI            | $\text{pCa}_{50}$ | $n_{\text{H}}$  | n |
| WT              | $7.26 \pm 0.11$   | $1.34 \pm 0.32$ | 5 |
| R170G           | $7.18 \pm 0.08$   | $1.49 \pm 0.35$ | 5 |
| R170W           | $7.16 \pm 0.07$   | $1.00 \pm 0.14$ | 5 |

  

| <b>+cMyBP-C</b> |                   |                 |   |
|-----------------|-------------------|-----------------|---|
| cTnI            | $\text{pCa}_{50}$ | $n_{\text{H}}$  | n |
| WT              | $7.06 \pm 0.05$   | $2.70 \pm 1.03$ | 5 |
| R170G           | $7.16 \pm 0.09$   | $1.49 \pm 0.39$ | 5 |
| R170W           | $7.18 \pm 0.10$   | $1.02 \pm 0.19$ | 5 |
