# Supplementary material for: Infantile restrictive cardiomyopathy: cTnI-R170G/W impair the interplay of sarcomeric proteins and the integrity of thin filaments
Source: PubMed Central journal article supplement (PMC7077804; doi:10.1371/journal.pone.0229227), 2020-03-17
Supplement: pone.0229227.s013.pdf [file pone.0229227.s013.pdf]

**S6 Table. Minimal activity and the activity amplitude of the actin/myosin S1-ATPase, measured in an enzyme coupled assay at pCa 9.8 and 4.5 as described before [14].** Briefly, reconstituted thin filaments containing wildtype cTnI, R170G or R170W were mixed with myosin S1 in presence of cMyBP-C. The ATP hydrolysis rate of actin/myosin S1 ATPase was measured by detecting inorganic phosphate release via an enzymatic cleavage of MESG by purine nucleoside phosphorylase. Data are given as activity  $\pm$ SEM (normalized to the activity of unregulated F-actin). P values from Student's t-test vs. cTnI-WT are given. n is the number of measurements.

| cTnI  | $y_{\min}$      | P( $y_{\min}$ ) vs. WT | Amp             | P(Amp) vs. WT | n |
|-------|-----------------|------------------------|-----------------|---------------|---|
| WT    | 0.43 $\pm$ 0.08 | –                      | 0.88 $\pm$ 0.09 | –             | 9 |
| R170G | 0.37 $\pm$ 0.06 | 0.557                  | 0.74 $\pm$ 0.08 | 0.262         | 9 |
| R170W | 0.64 $\pm$ 0.06 | 0.058                  | 0.61 $\pm$ 0.09 | 0.052         | 8 |
